# Supplementary material for: Intracerebroventricular Administration of C-Type Natriuretic Peptide Suppresses Food Intake via Activation of the Melanocortin System in Mice
Source: PubMed Central journal article supplement — Diabetes. 2013 Apr 16;62(5):1500–4. doi: 10.2337/db12-0718 (PMC3636603; doi:10.2337/db12-0718), 2013-04-16

SUPPLEMENTARY DATA

**Supplementary Table 1.** PCR Primers

| mRNA  | Primers                                                                            |
|-------|------------------------------------------------------------------------------------|
| POMC  | Sense: 5'-CCCAACGTTGCTGAGAACGAGTCG-3'<br>Antisense: 5'-GGAGGTCATGAAGCCACCGTAACG-3' |
| CART  | Sense: 5'-AGAGTAAACGCATTCCGATCTACGA-3'<br>Antisense: 5'-TCCTCACTGCGCACTGCTCT-3'    |
| NPY   | Sense: 5'-CTGACCCTCGCTCTATCTCTG-3'<br>Antisense: 5'-AGTATCTGGCCATGTCCTCTG-3'       |
| AgRP  | Sense: 5'-TTGTGTTCTGCTGTTGGCACT-3'<br>Antisense: 5'-AGCAAAAGGCATTGAAGAAGC-3'       |
| GAPDH | Sense: 5'-TGCACCACCAACTGCTTAGC-3'<br>Antisense: 5'-GGATGCAGGCATGATGTTCTG-3'        |

**Supplementary Table 2.** Body weight changes in the experiment on the effect of CNP on food intake in refeeding following 48-hr fasting.

| Treatment       | No. of mice | Changes of body weight (g) |
|-----------------|-------------|----------------------------|
| Saline          | (13)        | 1.8 ± 0.2                  |
| CNP-22 0.5 nmol | (8)         | 1.0 ± 0.3                  |
| 1.5 nmol        | (13)        | 1.2 ± 0.2                  |
| 4.5 nmol        | (12)        | 1.4 ± 0.2                  |
| CNP-53 0.5 nmol | (8)         | 1.4 ± 0.3                  |
| 1.5 nmol        | (15)        | 0.7 ± 0.2 **               |

Data represent mean ± SEM. Significant difference: \*\* p < 0.01.

SUPPLEMENTARY DATA

**Supplementary Table 3.** Body weight changes in the experiment on the effect of CNP on nocturnal food intake.

| Treatment | No. of mice | Changes of body weight (g) |
|-----------|-------------|----------------------------|
| Saline    | (7)         | 0.8 ± 0.3                  |
| CNP-22    | (8)         | 0.2 ± 0.4                  |
| CNP-53    | (9)         | 0.3 ± 0.2                  |

Data represent mean ± SEM.

**Supplementary Figure 1.** Effects of icv administration of CNP-53 (1.5 nmol/mouse) on mRNA expressions of (A) POMC, (B) CART, (C) NPY and (D) AgRP in the hypothalamus. The hypothalamus was collected at the end of the experiment to examine the effect of CNP-53 on food intake in refeeding following 48-hr fasting. Data represent mean ± SEM. The number of mice is given in parentheses. Significant differences: \* p < 0.05, \*\* p < 0.01.

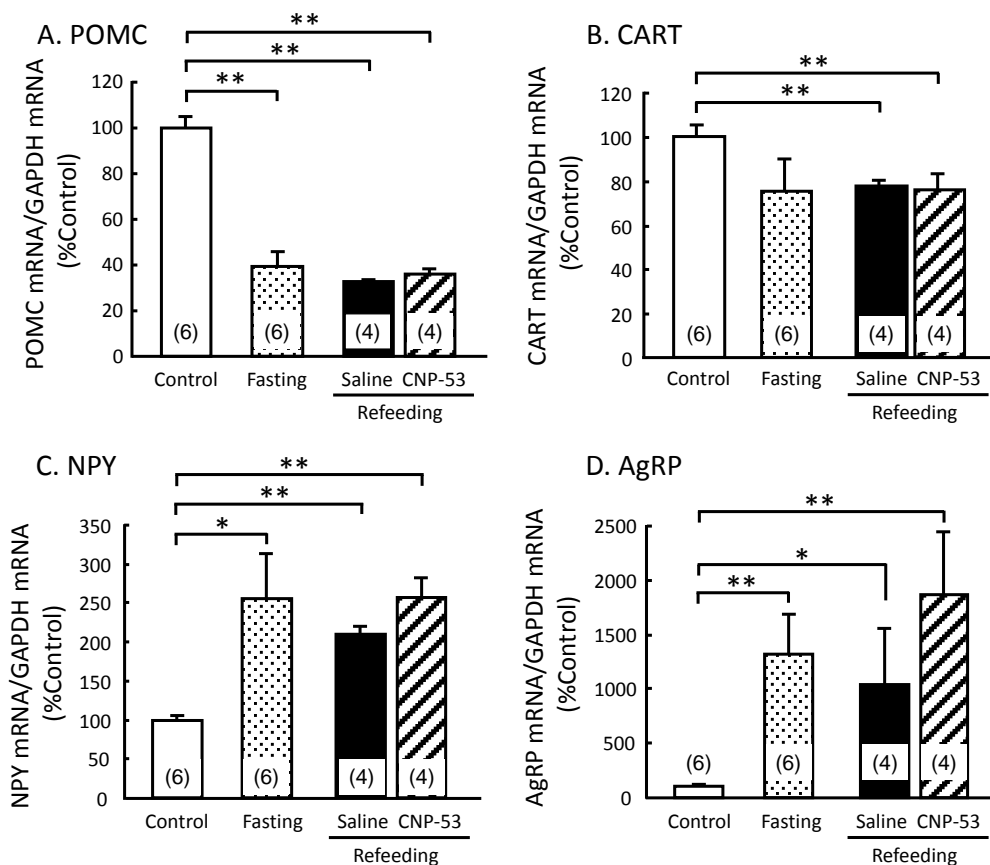

Supplement: supp_db12-0718_DB120718SupplementaryData.pdf [file supp_db12-0718_DB120718SupplementaryData.pdf]
